# Supplementary material for: The Development and Validation of a Measure to Assess COVID-19 Stress among College Students for Sustainable Education
Source: MDPI journal article supplement (doi:10.3390/su13179828), 2021-09-01
Supplement: s1 [file s1]

Archive with 4 entries (4 files):
- Supplementary_Files/suppl Material 1_Analysis.pdf
- Supplementary_Files/Suppl Material 2_Figures.pdf
- Supplementary_Files/Suppl Material_Data file_models.xlsx
- Supplementary_Files/Suppl Material_Initial 40 Items.pdf
