# Supplementary material for: The Development and Validation of a Measure to Assess COVID-19 Stress among College Students for Sustainable Education
Source: MDPI journal article supplement (doi:10.3390/su13179828), 2021-09-01
Supplement: s1 [file s1 › Supplementary_Files/suppl Material 1_Analysis.pdf]

**Table S1.** Descriptive Statistic and Inter-Item Correlation Matrix (N=173)

| Items | M    | SD    | SI1 | SI2  | SI3  | SSP1 | SSP2 | SSP3 | CF1  | CF2  | AD1  | AD2  | AD3  | CA12 | CA13 |
|-------|------|-------|-----|------|------|------|------|------|------|------|------|------|------|------|------|
| SI1   | 3.28 | 1.203 |     | .755 | .597 | .081 | .080 | .085 | .226 | .292 | .186 | .236 | .257 | .162 | .340 |
| SI2   | 3.28 | 1.193 |     |      | .519 | .084 | .081 | .107 | .163 | .211 | .154 | .218 | .188 | .184 | .321 |
| SI3   | 2.85 | 1.299 |     |      |      | .150 | .196 | .244 | .181 | .305 | .208 | .271 | .357 | .076 | .296 |
| SSP1  | 2.47 | 1.255 |     |      |      |      | .554 | .543 | .153 | .180 | .172 | .244 | .260 | .298 | .133 |
| SSP2  | 2.12 | 1.030 |     |      |      |      |      | .380 | .117 | .097 | .139 | .176 | .246 | .261 | .161 |
| SSP3  | 2.36 | 1.271 |     |      |      |      |      |      | .117 | .127 | .247 | .202 | .349 | .222 | .126 |
| CF1   | 3.22 | 1.033 |     |      |      |      |      |      |      | .608 | .157 | .106 | .248 | .106 | .342 |
| CF2   | 3.35 | 1.026 |     |      |      |      |      |      |      |      | .294 | .243 | .305 | .272 | .347 |
| AD1   | 2.77 | 1.167 |     |      |      |      |      |      |      |      |      | .559 | .433 | .199 | .214 |
| AD2   | 2.76 | 1.218 |     |      |      |      |      |      |      |      |      |      | .497 | .214 | .214 |
| AD3   | 3.02 | 1.161 |     |      |      |      |      |      |      |      |      |      |      | .223 | .308 |
| CA12  | 3.72 | 1.103 |     |      |      |      |      |      |      |      |      |      |      |      | .557 |
| CA13  | 3.61 | 1.164 |     |      |      |      |      |      |      |      |      |      |      |      |      |

Determinant = .009

**Table S2.** Item-Total Statistics

|      | Scale Mean if<br>Item Deleted | Scale Variance if<br>Item Deleted | Corrected Item-<br>Total Correlation | Squared Multiple<br>Correlation | Cronbach's Alpha<br>if Item Deleted |
|------|-------------------------------|-----------------------------------|--------------------------------------|---------------------------------|-------------------------------------|
| SI1  | 35.53                         | 60.704                            | .498                                 | .642                            | .799                                |
| SI2  | 35.54                         | 61.645                            | .450                                 | .588                            | .803                                |
| SI3  | 35.97                         | 59.534                            | .512                                 | .472                            | .798                                |
| SSP1 | 36.35                         | 61.681                            | .417                                 | .469                            | .806                                |
| SSP2 | 36.69                         | 64.284                            | .372                                 | .345                            | .809                                |
| SSP3 | 36.46                         | 61.738                            | .407                                 | .379                            | .807                                |
| CF1  | 35.60                         | 64.428                            | .361                                 | .437                            | .809                                |
| CF2  | 35.47                         | 62.611                            | .482                                 | .478                            | .801                                |
| AD1  | 36.04                         | 62.039                            | .440                                 | .374                            | .804                                |
| AD2  | 36.05                         | 60.957                            | .476                                 | .422                            | .801                                |
| AD3  | 35.79                         | 60.142                            | .555                                 | .400                            | .794                                |
| CA12 | 35.10                         | 63.159                            | .406                                 | .433                            | .806                                |
| CA13 | 35.20                         | 61.151                            | .493                                 | .462                            | .799                                |

N=173

**Table S3: Total Variance Explained**

| Component | Initial Eigenvalues |               |              | Extraction Sums of Squared Loadings |               |              | Rotation Sums of Squared Loadings <sup>a</sup> |
|-----------|---------------------|---------------|--------------|-------------------------------------|---------------|--------------|------------------------------------------------|
|           | Total               | % of Variance | Cumulative % | Total                               | % of Variance | Cumulative % | Total                                          |
| 1         | 4.079               | 31.376        | 31.376       | 4.079                               | 31.376        | 31.376       | 2.790                                          |
| 2         | 1.843               | 14.180        | 45.556       | 1.843                               | 14.180        | 45.556       | 2.443                                          |
| 3         | 1.338               | 10.294        | 55.850       | 1.338                               | 10.294        | 55.850       | 2.212                                          |
| 4         | 1.272               | 9.788         | 65.638       | 1.272                               | 9.788         | 65.638       | 2.657                                          |
| 5         | 1.064               | 8.183         | 73.821       | 1.064                               | 8.183         | 73.821       | 1.991                                          |
| 6         | .636                | 4.893         | 78.714       |                                     |               |              |                                                |
| 7         | .602                | 4.628         | 83.342       |                                     |               |              |                                                |
| 8         | .478                | 3.674         | 87.015       |                                     |               |              |                                                |
| 9         | .464                | 3.570         | 90.586       |                                     |               |              |                                                |
| 10        | .401                | 3.088         | 93.674       |                                     |               |              |                                                |
| 11        | .333                | 2.560         | 96.234       |                                     |               |              |                                                |
| 12        | .262                | 2.015         | 98.249       |                                     |               |              |                                                |
| 13        | .228                | 1.751         | 100.000      |                                     |               |              |                                                |

**Table S4. Descriptive Statistics and Bivariate Correlations between the five factors (N=173)**

| Factors                      | M    | SD    | SSP   | CF     | AD     | CA     |
|------------------------------|------|-------|-------|--------|--------|--------|
| Social Isolation (SI)        | 9.41 | 3.193 | .178* | .297** | .329** | .303** |
| Sleep-Somatic Problems (SSP) | 6.95 | 2.900 |       | .183*  | .343** | .275** |
| Contamination Fear (CF)      | 6.57 | 1.847 |       |        | .307** | .340** |
| Academic Distress (AD)       | 8.56 | 2.892 |       |        |        | .318** |
| Career Apprehensions (CA)    | 7.33 | 2.000 |       |        |        |        |

\*\*p<.01; \*p<.05;

**Table S5. Test of Normality: Shapiro-Wilk**

| Test of Normality |     |      |
|-------------------|-----|------|
| Shapiro-Wilk      |     |      |
| Statistic         | df  | Sig. |
| .987              | 173 | .098 |

**Table S6.** CFA: Assessment of normality

| Variable     | min   | max   | skew  | c.r.   | kurtosis | c.r.   |
|--------------|-------|-------|-------|--------|----------|--------|
| SI1          | 1.000 | 5.000 | .056  | .335   | -.384    | -1.153 |
| SI2          | 1.000 | 5.000 | -.032 | -.195  | -.424    | -1.271 |
| SI3          | 1.000 | 5.000 | -.172 | -1.032 | -.048    | -.143  |
| SSP1         | 1.000 | 5.000 | .127  | .764   | -.541    | -1.624 |
| SSP2         | 1.000 | 5.000 | .456  | 2.737  | -.250    | -.751  |
| SSP3         | 1.000 | 5.000 | .754  | 4.526  | -.182    | -.547  |
| CF1          | 1.000 | 5.000 | .223  | 1.335  | -.298    | -.894  |
| CF2          | 1.000 | 5.000 | .219  | 1.312  | -.194    | -.582  |
| AD1          | 1.000 | 5.000 | -.057 | -.342  | -.431    | -1.294 |
| AD2          | 1.000 | 5.000 | -.097 | -.585  | -.268    | -.803  |
| AD3          | 1.000 | 5.000 | -.126 | -.754  | -.024    | -.073  |
| CA1          | 1.000 | 5.000 | -.202 | -1.212 | -.466    | -1.397 |
| CA2          | 1.000 | 5.000 | -.239 | -1.435 | -.495    | -1.486 |
| Multivariate |       |       |       |        | 20.423   | 7.599  |
| (N=216)      |       |       |       |        |          |        |

**Table S7.** Descriptive Statistics and Inter-Item Correlations for the five factor model

| Items | M    | SD    | SI1    | SI2    | SI3    | SSP1   | SSP2   | SSP3   | CF1    | CF2    | AD1    | AD2    | AD3    | CA1    |
|-------|------|-------|--------|--------|--------|--------|--------|--------|--------|--------|--------|--------|--------|--------|
| SI1   | 3.05 | 1.042 |        |        |        |        |        |        |        |        |        |        |        |        |
| SI2   | 3.08 | 1.079 | .790** |        |        |        |        |        |        |        |        |        |        |        |
| SI3   | 3.18 | .968  | .531** | .534** |        |        |        |        |        |        |        |        |        |        |
| SSP1  | 2.56 | 1.001 | .314** | .383** | .349** |        |        |        |        |        |        |        |        |        |
| SSP2  | 2.28 | .997  | .198** | .255** | .175*  | .479** |        |        |        |        |        |        |        |        |
| SSP3  | 2.03 | 1.034 | .387** | .427** | .413** | .565** | .439** |        |        |        |        |        |        |        |
| CF1   | 2.95 | .975  | .428** | .402** | .399** | .497** | .402** | .597** |        |        |        |        |        |        |
| CF2   | 2.69 | 1.027 | .374** | .402** | .342** | .485** | .319** | .591** | .681** |        |        |        |        |        |
| AD1   | 3.13 | 1.001 | .186** | .300** | .136*  | .190** | .202** | .140*  | .192** | .111   |        |        |        |        |
| AD2   | 3.03 | .947  | .310** | .348** | .222** | .265** | .128   | .256** | .294** | .216** | .648** |        |        |        |
| AD3   | 3.27 | .937  | .330** | .336** | .306** | .233** | .226** | .261** | .260** | .162*  | .588** | .771** |        |        |
| CA1   | 3.50 | .969  | .447** | .427** | .313** | .336** | .230** | .362** | .430** | .415** | .295** | .444** | .408** |        |
| CA2   | 3.56 | .986  | .477** | .436** | .295** | .376** | .296** | .436** | .475** | .415** | .286** | .458** | .411** | .825** |

N=216; \*\*p&lt;.01; \*p&lt;.05

**Table S8.** Bootstrapped Standard Errors

| Items | SE   | SE-SE | Mean  | Bias | SE-Bias |
|-------|------|-------|-------|------|---------|
| SI1   | .000 | .000  | 1.000 | .000 | .000    |
| SI2   | .063 | .001  | 1.053 | .003 | .002    |
| SI3   | .070 | .002  | .646  | .003 | .002    |
| SSP1  | .000 | .000  | 1.000 | .000 | .000    |
| SSP2  | .099 | .002  | .784  | .008 | .003    |
| SSP3  | .123 | .003  | 1.193 | .016 | .004    |
| CF1   | .000 | .000  | 1.000 | .000 | .000    |
| CF2   | .086 | .002  | 1.006 | .006 | .003    |
| AD1   | .000 | .000  | 1.000 | .000 | .000    |
| AD2   | .117 | .003  | 1.258 | .012 | .004    |
| AD3   | .103 | .002  | 1.137 | .011 | .003    |
| CA1   | .000 | .000  | 1.000 | .000 | .000    |
| CA2   | .084 | .002  | 1.078 | .006 | .003    |

**Table S9.** Squared multiple correlations

| Items | Estimate | Lower | Upper | P    |
|-------|----------|-------|-------|------|
| SI1   | .776     | .671  | .871  | .002 |
| SI2   | .797     | .691  | .877  | .003 |
| SI3   | .372     | .254  | .481  | .003 |
| SSP1  | .512     | .362  | .637  | .002 |
| SSP2  | .311     | .179  | .448  | .002 |
| SSP3  | .664     | .553  | .768  | .003 |
| AD3   | .706     | .583  | .806  | .003 |
| AD2   | .847     | .744  | .939  | .002 |
| AD1   | .488     | .361  | .627  | .002 |
| CF1   | .716     | .602  | .824  | .002 |
| CF2   | .647     | .514  | .746  | .004 |
| CA1   | .783     | .653  | .894  | .003 |
| CA2   | .869     | .743  | .965  | .004 |

**Table S10.** t-test comparison between genders

| Variable               | Gender | N   | M     | SD    | SEM  | t test | p    |
|------------------------|--------|-----|-------|-------|------|--------|------|
| Social Isolation       | Male   | 106 | 8.990 | 2.573 | .249 | 1.707  | .089 |
|                        | female | 110 | 9.609 | 2.746 | .261 |        |      |
| Sleep-Somatic Problems | Male   | 106 | 6.377 | 2.368 | .230 | 2.932  | .004 |
|                        | female | 110 | 7.345 | 2.481 | .236 |        |      |
| Contamination Fear     | Male   | 106 | 5.084 | 1.574 | .152 | 4.509  | .000 |
|                        | female | 110 | 6.163 | 1.918 | .182 |        |      |
| Academic Distress      | Male   | 106 | 9.367 | 2.489 | .241 | -.355  | .723 |
|                        | female | 110 | 9.490 | 2.608 | .248 |        |      |
| Career Apprehension    | Male   | 106 | 6.849 | 1.829 | .177 | -1.637 | .103 |
|                        | female | 110 | 7.263 | 1.889 | .180 |        |      |

df=214, N=216

**Table S11:** Bivariate Correlation between the Stress Scale and SCSS

| Factors/Variables | STRESS_ToT | SI     | SSP    | CF     | AD     | CA     | SCSS_Tot |
|-------------------|------------|--------|--------|--------|--------|--------|----------|
| STRESS_ToT        | 1          |        |        |        |        |        |          |
| SI                | .429**     | 1      |        |        |        |        |          |
| SSP               | .547**     | .463** | 1      |        |        |        |          |
| CF                | .467**     | .500** | .652** | 1      |        |        |          |
| AD                | .374**     | .397** | .313** | .263** | 1      |        |          |
| CA                | .465**     | .476** | .437** | .489** | .490** | 1      |          |
| SCSS_ToT          | .610**     | .779** | .770** | .751** | .681** | .748** | 1        |

N=192

**Table S12.** Area Under the Curve: SCSS

| Area | Std. Error | Asymptotic Sig.b | Asymptotic 95% Confidence Interval |             |
|------|------------|------------------|------------------------------------|-------------|
|      |            |                  | Lower Bound                        | Upper Bound |
| .779 | .036       | .000             | .708                               | .850        |

Positive cases: 67; Negative cases: 125

**Table S13.** Sensitivity and Specificity of the Scale

| Coordinates of the Curve                |             |                 |
|-----------------------------------------|-------------|-----------------|
| Positive if Greater Than<br>or Equal To | Sensitivity | 1 - Specificity |
| 16.00                                   | 1.000       | 1.000           |
| 17.50                                   | 1.000       | .992            |
| 18.50                                   | 1.000       | .984            |
| 20.00                                   | 1.000       | .976            |
| 21.50                                   | 1.000       | .960            |
| 22.50                                   | 1.000       | .952            |
| 23.50                                   | .985        | .944            |
| 24.50                                   | .985        | .920            |
| 25.50                                   | .985        | .912            |
| 26.50                                   | .970        | .896            |
| 27.50                                   | .955        | .880            |
| 28.50                                   | .940        | .848            |
| 29.50                                   | .940        | .816            |
| 30.50                                   | .940        | .760            |
| 31.50                                   | .940        | .728            |
| 32.50                                   | .925        | .672            |
| 33.50                                   | .881        | .584            |
| 34.50                                   | .836        | .528            |
| 35.50                                   | .836        | .464            |
| 36.50                                   | .806        | .424            |
| 37.50                                   | .761        | .376            |
| 38.50                                   | .731        | .312            |
| 39.50                                   | .701        | .248            |
| 40.50                                   | .672        | .232            |
| 41.50                                   | .642        | .208            |
| 42.50                                   | .597        | .176            |
| 43.50                                   | .552        | .144            |
| 44.50                                   | .463        | .096            |
| 45.50                                   | .403        | .072            |
| 46.50                                   | .373        | .048            |
| 47.50                                   | .313        | .048            |
| 48.50                                   | .284        | .048            |
| 49.50                                   | .239        | .040            |
| 50.50                                   | .224        | .016            |
| 51.50                                   | .164        | .000            |
| 53.00                                   | .119        | .000            |
| 54.50                                   | .090        | .000            |
| 55.50                                   | .075        | .000            |
| 56.50                                   | .060        | .000            |
| 57.50                                   | .030        | .000            |
| 58.50                                   | .015        | .000            |
| 60.00                                   | .000        | .000            |
