# Supplementary material for: The Development and Validation of a Measure to Assess COVID-19 Stress among College Students for Sustainable Education
Source: MDPI journal article supplement (doi:10.3390/su13179828), 2021-09-01
Supplement: s1 [file s1 › Supplementary_Files/Suppl Material 2_Figures.pdf]

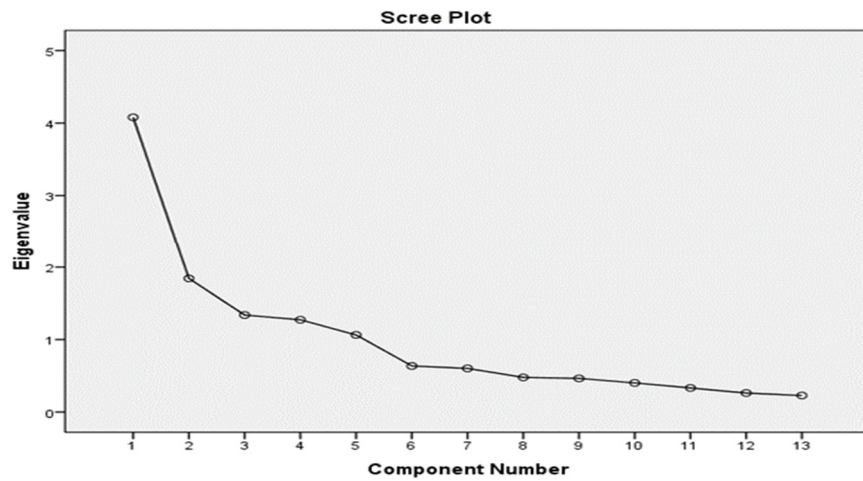

Figure S1. Scree plot output indicating that the data have five factors

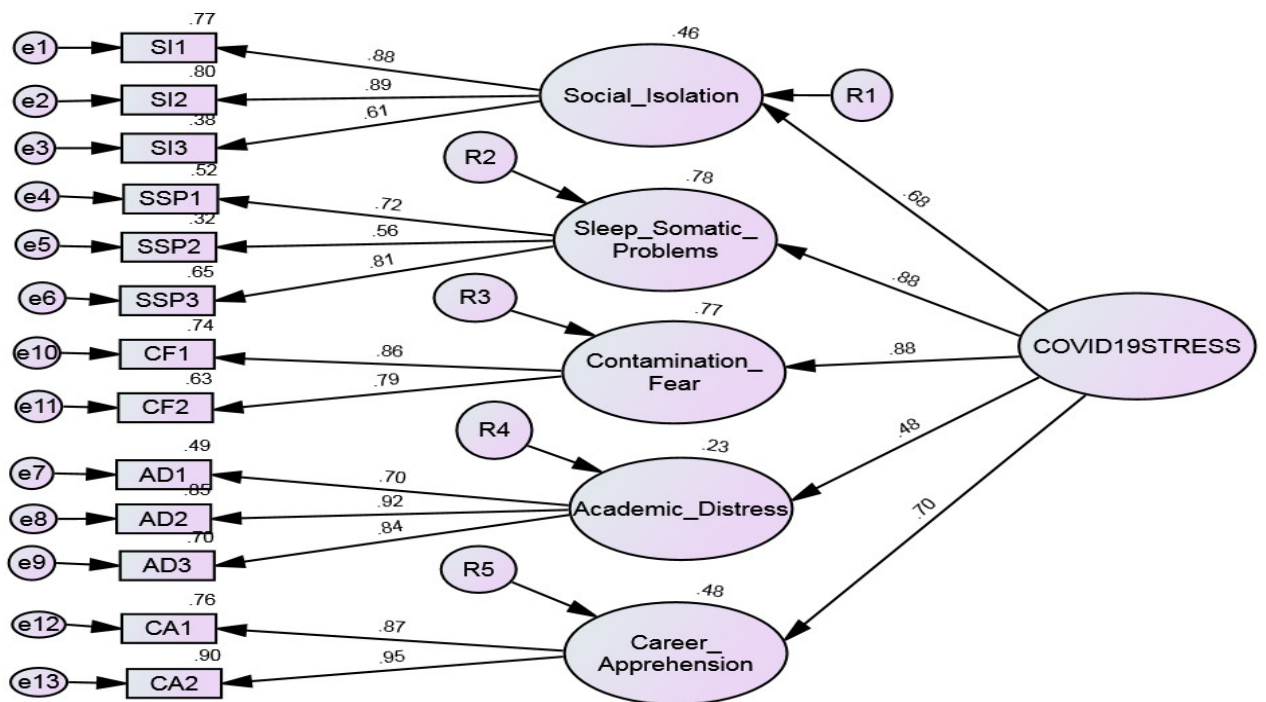

Figure S2. Model diagram for the second order analysis

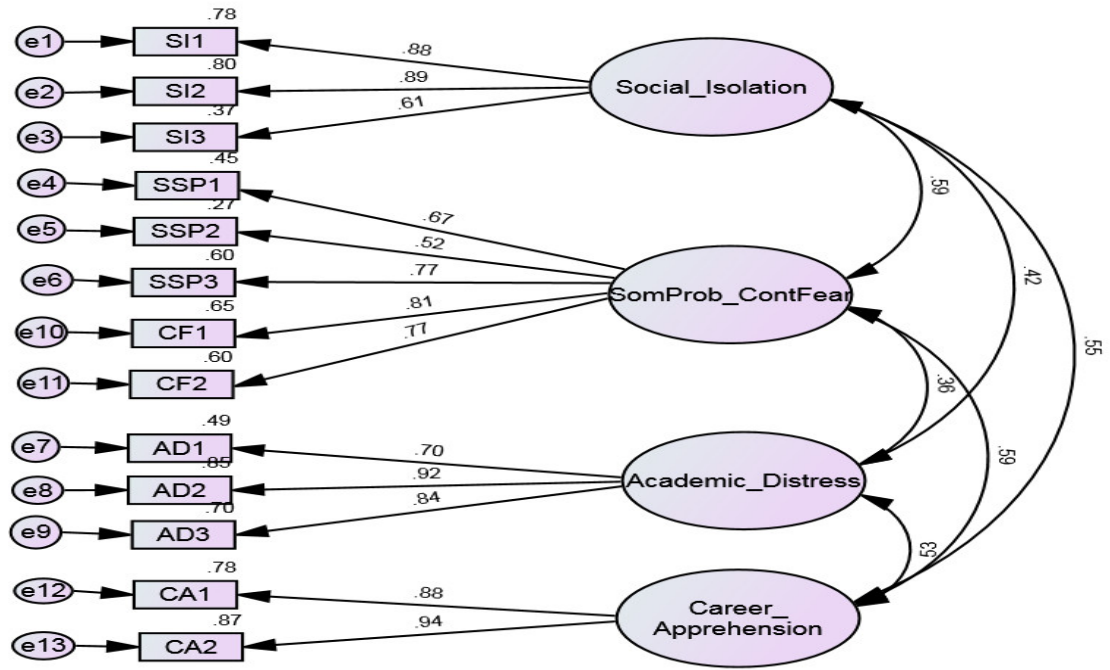

Figure S3. Model diagram for the four factor model
