# Supplementary material for: The Development and Validation of a Measure to Assess COVID-19 Stress among College Students for Sustainable Education
Source: MDPI journal article supplement (doi:10.3390/su13179828), 2021-09-01
Supplement: s1 [file s1 › Supplementary_Files/Suppl Material_Data file_models.xlsx]

## Sheet: EFAModel_Data
Id_No	Age	Gender	SI2	SI1	SI3	SSP3	SSP2	SSP1	AD1	AD2	AD3	CF1	CF2	CA12	CA13	Tot_SCSS
E1	20	1	3	4	3	2	2	3	4	4	4	4	3	5	5	46
E2	22	0	5	5	5	5	2	4	3	5	1	1	1	5	5	47
E3	21	1	3	4	4	2	2	3	3	3	4	4	4	3	4	43
E4	22	1	3	3	2	3	3	4	5	5	5	2	3	5	5	48
E5	22	1	2	3	3	3	3	3	3	3	3	3	4	5	5	43
E6	22	1	3	3	3	3	3	3	3	3	3	3	3	3	3	39
E7	21	1	4	3	5	2	5	5	1	1	1	4	4	3	4	42
E8	23	0	1	1	1	3	1	3	1	1	3	1	1	4	1	22
E9	22	1	2	2	1	2	2	3	4	3	3	3	2	4	4	35
E10	22	1	4	4	3	1	1	1	3	3	2	2	2	3	3	32
E11	21	0	5	3	4	1	1	2	3	3	2	3	4	5	3	39
E12	23	1	5	5	3	3	3	3	1	1	1	3	3	4	3	38
E13	21	0	5	5	2	4	1	3	2	2	3	4	3	5	5	44
E14	22	1	3	3	3	4	1	1	2	1	3	3	4	2	1	31
E15	24	0	4	3	3	3	1	2	3	3	3	3	3	4	4	39
E16	21	1	4	4	3	2	1	2	2	3	2	3	3	5	4	38
E17	22	0	1	2	1	1	1	2	3	3	2	2	2	2	2	24
E18	22	1	2	3	1	3	3	5	3	2	4	5	4	5	4	44
E19	22	1	4	5	4	5	2	2	4	1	3	5	5	3	4	47
E20	21	1	2	2	3	5	5	5	1	4	5	3	2	5	1	43
E21	23	0	3	2	3	3	2	3	2	3	3	2	3	5	3	37
E22	22	1	1	1	1	2	2	1	2	2	1	3	2	4	4	26
E23	22	0	4	3	1	3	3	2	2	3	3	3	2	3	1	33
E24	21	1	3	3	4	2	1	2	2	2	2	2	3	3	4	33
E25	22	0	4	4	5	1	1	1	4	5	4	5	5	2	5	46
E26	20	1	3	1	1	4	3	4	3	1	2	1	1	5	1	30
E27	23	1	2	2	1	1	2	1	4	2	2	3	3	3	2	28
E28	21	0	3	2	1	2	3	4	1	1	1	4	3	5	4	34
E29	22	1	4	3	3	5	5	5	5	4	3	4	5	5	5	56
E30	21	1	5	4	4	3	3	4	3	2	3	3	2	3	4	43
E31	21	1	5	5	2	1	1	5	3	3	3	5	5	5	5	48
E32	22	0	1	1	1	5	1	5	1	1	1	1	2	1	1	22
E33	22	1	3	2	3	2	3	3	4	4	4	2	3	4	4	41
E34	21	1	5	5	3	5	3	3	5	5	5	5	5	5	5	59
E35	22	0	3	3	3	4	2	3	3	3	3	3	4	4	3	41
E36	24	1	4	4	2	2	4	5	1	2	2	2	3	5	5	41
E37	21	1	5	5	5	1	1	1	2	2	2	4	4	5	5	42
E38	21	1	1	1	1	2	2	2	3	2	1	2	2	5	2	26
E39	22	1	5	5	5	1	3	2	1	1	1	3	4	5	5	41
E40	22	1	2	3	4	3	3	3	2	3	4	2	2	3	3	37
E41	23	0	3	4	3	3	2	3	3	3	3	2	2	3	3	37
E42	22	0	3	4	2	1	2	1	3	4	2	4	3	4	4	37
E43	24	1	3	2	2	5	2	4	4	5	5	3	5	5	5	50
E44	23	0	4	4	3	3	3	3	3	4	4	3	4	4	3	45
E45	22	1	4	5	5	5	3	4	4	5	5	4	5	4	5	58
E46	22	0	4	4	5	2	1	2	3	3	3	3	4	3	4	41
E47	21	1	4	4	4	1	1	3	2	2	3	4	4	4	4	40
E48	21	1	5	5	3	3	2	3	3	4	4	5	5	4	3	49
E49	19	0	3	3	3	2	3	3	3	4	5	4	5	5	3	46
E50	21	1	5	5	5	3	5	4	3	4	5	3	3	5	5	55
E51	22	1	3	1	1	3	2	1	1	1	2	4	1	3	4	27
E52	20	1	2	1	1	1	2	3	1	1	1	1	2	3	3	22
E53	23	0	5	5	3	4	3	2	4	4	5	4	3	4	4	50
E54	21	1	4	4	2	1	2	1	1	1	2	3	3	1	1	26
E55	24	0	4	3	2	1	1	1	1	3	2	3	3	4	3	31
E56	24	1	2	2	3	2	2	3	2	3	3	5	4	4	4	39
E57	23	0	2	1	3	2	3	3	3	3	3	3	3	2	4	35
E58	23	0	4	4	4	1	1	1	3	4	4	2	3	3	3	37
E59	23	0	4	3	3	1	1	1	3	4	3	3	3	3	3	35
E60	21	1	4	3	2	1	1	2	3	4	3	4	4	3	3	37
E61	23	1	4	4	2	1	2	3	3	3	3	3	3	4	4	39
E62	21	1	3	3	2	2	2	3	2	3	3	4	3	3	4	37
E63	22	1	5	5	5	2	2	3	3	3	2	5	5	4	5	49
E64	22	1	3	3	4	3	2	5	1	3	3	4	3	2	2	38
E65	22	1	3	3	3	2	1	1	3	3	3	4	4	4	3	37
E66	19	0	3	3	3	3	2	4	4	4	4	3	4	2	4	43
E67	21	1	3	4	3	2	3	3	2	3	3	3	4	4	4	41
E68	20	1	3	3	3	4	1	5	4	3	5	3	4	5	4	47
E69	23	0	4	4	3	1	1	1	3	3	3	2	3	3	3	34
E70	23	0	4	4	3	1	3	1	2	3	3	2	3	3	3	35
E71	24	1	2	2	2	2	3	1	3	2	2	3	3	3	4	32
E72	22	1	2	2	2	1	1	1	1	3	3	4	3	3	3	29
E73	20	1	5	4	3	3	1	3	3	3	1	3	3	1	3	36
E74	20	1	4	3	5	5	1	1	1	1	5	4	4	5	5	44
E75	21	1	1	2	1	1	1	1	4	2	2	4	4	4	5	32
E76	23	1	3	3	4	3	2	2	4	1	2	3	3	3	1	34
E77	22	0	4	5	1	1	3	3	2	1	2	4	4	3	4	37
E78	18	0	5	3	1	1	1	1	1	1	1	3	2	2	4	26
E79	18	1	5	5	5	3	2	2	4	5	4	2	3	5	5	50
E80	21	0	4	4	4	2	3	4	2	2	2	2	2	3	1	35
E81	21	0	2	3	3	1	2	2	4	3	3	3	4	3	2	35
E82	18	1	3	4	4	3	2	5	3	1	3	5	3	3	4	43
E83	22	1	2	2	1	3	1	2	2	3	2	3	3	3	3	30
E84	21	1	4	5	4	2	3	5	1	3	3	4	4	2	1	41
E85	23	0	3	3	2	2	1	2	3	2	4	3	3	2	4	34
E86	20	1	4	3	3	4	3	3	2	3	3	3	3	4	4	42
E87	21	0	3	3	3	1	1	2	4	3	3	5	4	3	3	38
E88	22	0	3	4	3	2	2	2	2	2	3	2	3	3	3	34
E89	19	1	4	3	2	1	2	2	2	2	3	2	4	4	3	34
E90	21	1	2	1	2	1	1	1	3	2	2	2	2	2	1	22
E91	23	0	4	4	3	2	2	2	3	3	3	3	4	3	4	40
E92	22	1	3	4	3	1	1	1	1	1	3	3	3	4	4	32
E93	19	1	2	1	1	3	1	3	3	2	1	5	5	4	3	34
E94	22	1	4	5	5	5	3	3	2	3	3	5	4	2	3	47
E95	23	1	1	1	1	1	1	3	3	3	3	3	3	4	3	30
E96	21	0	4	5	3	1	4	4	3	5	4	3	2	5	4	47
E97	24	0	3	3	1	5	4	3	2	2	4	3	2	5	5	42
E98	23	0	3	3	5	5	4	5	5	5	5	3	3	5	5	56
E99	21	1	3	3	1	1	1	1	1	1	1	1	3	5	4	26
E100	20	1	1	1	1	1	1	1	3	4	1	3	3	3	3	26
E101	22	1	4	5	3	2	2	3	4	4	3	1	3	5	3	42
E102	22	0	4	4	4	3	2	2	3	1	3	3	3	3	3	38
E103	21	1	4	4	4	3	2	2	3	2	3	3	4	3	4	41
E104	23	1	2	3	4	4	2	2	3	3	5	2	4	1	2	37
E105	23	1	4	4	3	4	3	5	5	4	5	3	4	5	5	54
E106	20	0	5	5	5	1	1	1	2	1	5	3	4	3	5	41
E107	22	1	2	2	3	2	2	3	4	4	3	3	4	4	4	40
E108	22	0	3	3	2	1	4	1	5	1	5	2	3	5	5	40
E109	21	1	2	2	1	3	2	3	4	3	4	5	5	3	2	39
E110	21	0	3	5	3	2	3	3	3	3	1	3	4	4	3	40
E111	20	0	5	5	3	1	1	1	1	1	2	3	2	5	5	35
E112	19	0	2	4	4	2	1	1	3	4	4	3	4	2	3	37
E113	22	0	5	5	5	2	2	3	5	3	4	5	5	5	5	54
E114	20	1	1	3	1	3	3	3	3	1	3	3	3	4	3	34
E115	18	1	5	5	5	1	1	1	1	3	1	1	5	5	3	37
E116	22	1	3	3	3	1	1	1	1	1	5	5	4	3	5	36
E117	23	1	2	1	1	2	1	2	3	2	1	3	5	5	3	31
E118	22	1	4	4	4	1	3	2	4	3	3	3	3	3	4	41
E119	22	0	2	5	4	3	1	1	2	1	3	3	2	2	2	31
E120	22	1	3	3	2	2	3	3	1	1	2	4	3	3	4	34
E121	23	1	2	2	2	2	4	2	2	2	2	4	4	3	4	35
E122	20	1	4	4	3	3	3	3	4	4	3	4	4	3	4	46
E123	24	0	3	2	1	3	2	3	1	2	3	1	3	5	5	34
E124	22	0	5	5	5	3	3	2	3	4	4	3	3	3	5	48
E125	24	1	2	5	1	1	1	1	3	3	2	3	3	4	5	34
E126	23	1	3	3	4	3	1	2	5	5	5	3	4	5	5	48
E127	21	1	4	4	4	2	4	4	4	4	4	5	4	4	4	51
E128	22	0	3	4	4	2	1	1	4	1	2	5	4	3	4	38
E129	22	1	4	4	1	3	2	3	5	5	5	4	5	5	5	51
E130	22	1	5	5	5	4	2	3	3	1	5	5	5	5	5	53
E131	21	1	4	4	5	3	3	5	5	5	5	4	4	5	5	57
E132	24	1	1	2	2	3	3	2	2	2	1	4	5	5	5	37
E133	18	0	1	1	1	1	1	1	1	1	1	3	1	2	2	17
E134	24	1	4	4	5	5	3	5	4	4	5	4	5	5	5	58
E135	20	0	1	3	2	1	1	1	1	1	3	2	2	5	5	28
E136	20	0	2	2	1	1	1	2	1	1	3	4	4	4	4	30
E137	22	1	3	3	1	1	1	1	3	3	3	3	3	1	1	27
E138	23	0	5	4	5	2	1	1	4	4	4	2	1	4	5	42
E139	22	1	4	3	4	3	3	3	1	1	3	3	3	4	5	40
E140	20	0	1	1	2	1	3	1	1	1	2	3	2	2	2	22
E141	22	0	3	3	3	3	3	3	4	4	4	4	4	5	4	47
E142	23	0	4	3	2	5	3	4	4	3	3	4	2	5	4	46
E143	22	0	3	2	2	5	3	4	4	3	3	4	4	5	4	46
E144	22	1	5	5	5	3	3	3	5	5	5	5	5	5	5	59
E145	21	1	5	4	3	3	3	3	3	2	3	3	3	3	3	41
E146	23	1	4	3	2	3	2	2	3	3	2	2	2	2	2	32
E147	23	1	1	1	1	2	2	3	3	1	2	3	3	3	3	28
E148	22	0	4	4	4	4	1	1	4	2	2	2	1	3	3	35
E149	22	1	5	4	4	5	3	3	3	4	4	4	5	5	5	54
E150	21	0	3	4	5	5	3	3	4	5	5	4	4	4	5	54
E151	22	0	4	3	2	1	1	2	3	4	4	4	3	3	3	37
E152	22	1	4	3	5	2	5	3	4	3	3	4	5	5	5	51
E153	23	0	4	3	2	1	1	1	3	3	2	2	3	3	3	31
E154	19	1	3	3	2	2	3	2	2	4	4	3	3	4	4	39
E155	24	1	4	5	3	2	2	2	3	2	4	3	4	4	3	41
E156	22	1	5	4	1	1	1	1	2	2	3	4	3	5	5	37
E157	21	1	1	3	3	4	3	5	3	4	4	3	4	5	3	45
E158	23	1	3	3	2	3	3	3	3	4	4	3	4	4	2	41
E159	22	1	4	4	3	2	2	1	4	4	2	3	3	3	2	37
E160	22	0	2	2	3	2	3	2	1	4	4	4	2	2	4	35
E161	20	0	2	3	2	2	1	1	1	2	2	5	5	5	5	36
E162	22	0	3	3	3	1	2	2	4	2	3	2	3	3	2	33
E163	21	1	3	4	4	2	3	1	3	3	3	5	5	5	4	45
E164	22	1	4	3	2	1	1	1	3	3	3	3	3	3	3	33
E165	22	0	3	3	2	1	2	1	3	3	3	3	3	4	3	34
E166	23	1	4	4	2	1	1	3	1	4	3	4	4	4	4	39
E167	23	0	4	4	2	1	1	1	5	4	3	3	3	4	4	39
E168	22	1	2	1	3	1	2	1	1	3	4	3	3	3	3	30
E169	22	1	2	1	2	2	2	1	3	1	3	2	3	3	3	28
E170	23	1	5	5	5	3	3	4	3	3	4	5	5	5	5	55
E171	23	1	4	3	2	1	2	1	3	3	3	3	3	3	3	34
E172	22	0	2	3	3	1	1	1	2	3	2	2	2	3	3	28
E173	21	1	1	2	3	1	3	3	2	2	3	3	3	4	4	34

## Sheet: CFA Model_Data
Id_No	Age	Gender	SI2	SI1	SI3	SSP3	SSP2	SSP1	AD1	AD2	AD3	CF1	CF2	CA1	CA2	Tot_SCSS	SI	SSP	CF	AD	CA
C1	22	1	4	3	2	2	2	3	3	3	3	3	3	4	4	39	9	7	6	9	8
C2	22	0	4	4	4	3	2	2	3	4	4	2	2	4	4	42	12	7	4	11	8
C3	23	0	5	5	5	4	3	4	3	3	4	4	4	3	3	50	15	11	8	10	6
C4	23	1	5	3	5	4	3	4	4	4	4	4	3	3	3	49	13	11	7	12	6
C5	22	1	3	3	4	2	2	3	4	4	3	5	4	2	2	41	10	7	9	11	4
C6	21	1	2	2	3	1	2	1	3	3	3	2	2	4	4	32	7	4	4	9	8
C7	20	0	2	2	4	1	1	1	3	3	3	2	2	4	4	32	8	3	4	9	8
C8	18	1	2	2	3	1	2	3	4	4	4	3	2	4	4	38	7	6	5	12	8
C9	18	0	4	4	3	2	2	2	5	5	5	3	2	4	4	45	11	6	5	15	8
C10	19	0	3	2	3	2	2	3	4	5	5	4	3	4	4	44	8	7	7	14	8
C11	23	0	4	3	4	4	4	5	3	3	3	4	4	4	4	49	11	13	8	9	8
C12	23	0	2	3	3	1	1	2	3	3	3	2	3	2	2	30	8	4	5	9	4
C13	22	1	5	5	4	1	1	1	4	3	3	4	3	4	4	42	14	3	7	10	8
C14	23	0	3	3	4	2	2	3	4	4	4	3	2	4	4	42	10	7	5	12	8
C15	23	0	5	5	5	1	1	1	2	2	2	3	3	3	3	36	15	3	6	6	6
C16	19	0	2	4	3	3	2	1	4	4	4	3	2	5	5	42	9	6	5	12	10
C17	24	0	3	4	4	2	3	3	3	3	4	4	3	4	4	44	11	8	7	10	8
C18	23	0	2	3	2	2	1	2	3	3	3	3	3	4	4	35	7	5	6	9	8
C19	22	1	3	3	1	1	1	2	2	4	3	3	3	3	2	31	7	4	6	9	5
C20	22	0	3	4	2	1	4	2	1	1	1	3	2	5	5	34	9	7	5	3	10
C21	22	0	4	4	3	2	1	2	4	4	4	3	4	4	4	43	11	5	7	12	8
C22	23	1	5	5	4	2	1	1	5	4	4	3	3	4	4	45	14	4	6	13	8
C23	22	1	3	2	3	3	2	2	4	4	4	3	3	5	5	43	8	7	6	12	10
C24	24	1	5	4	5	3	1	3	2	2	2	4	4	5	4	44	14	7	8	6	9
C25	22	0	2	2	3	1	1	1	3	3	4	2	3	4	4	33	7	3	5	10	8
C26	21	1	3	2	4	4	5	4	3	3	3	5	5	4	4	49	9	13	10	9	8
C27	22	0	3	3	3	2	1	2	2	2	2	3	3	4	4	34	9	5	6	6	8
C28	23	0	2	3	3	1	1	2	2	2	2	3	3	5	5	34	8	4	6	6	10
C29	22	0	4	4	3	3	2	2	3	4	4	4	3	4	4	44	11	7	7	11	8
C30	23	0	3	3	3	2	1	2	2	4	4	3	3	4	4	38	9	5	6	10	8
C31	22	1	2	2	3	1	2	2	1	2	3	3	3	3	3	30	7	5	6	6	6
C32	23	1	2	3	1	2	3	3	3	4	4	3	3	4	4	39	6	8	6	11	8
C33	22	1	3	3	3	2	3	3	2	3	4	4	4	4	4	42	9	8	8	9	8
C34	23	0	1	2	3	1	2	1	3	3	3	3	4	4	4	34	6	4	7	9	8
C35	22	0	5	4	4	3	3	3	4	4	4	4	3	5	5	51	13	9	7	12	10
C36	20	1	2	2	3	2	2	3	4	4	4	2	2	3	3	36	7	7	4	12	6
C37	23	1	4	4	4	3	2	2	3	3	3	4	4	4	4	44	12	7	8	9	8
C38	24	1	2	2	3	2	2	3	2	2	2	4	3	3	3	33	7	7	7	6	6
C39	22	1	4	4	4	5	3	5	4	5	5	5	5	4	4	57	12	13	10	14	8
C40	22	1	2	2	2	3	3	4	3	3	3	5	5	4	5	44	6	10	10	9	9
C41	22	1	2	3	4	4	3	4	3	3	5	5	5	5	5	51	9	11	10	11	10
C42	24	1	4	5	5	3	2	2	4	4	4	4	3	5	5	50	14	7	7	12	10
C43	23	1	1	1	3	1	2	1	3	3	4	3	2	3	4	31	5	4	5	10	7
C44	21	0	2	2	3	1	1	2	2	3	3	2	1	3	3	28	7	4	3	8	6
C45	21	1	1	2	2	1	2	2	3	3	3	3	2	2	2	28	5	5	5	9	4
C46	22	1	4	4	3	1	1	2	3	3	4	4	3	3	3	38	11	4	7	10	6
C47	22	1	3	3	3	2	3	3	2	2	2	3	3	3	3	35	9	8	6	6	6
C48	24	0	2	2	4	1	1	3	2	2	3	2	1	2	2	27	8	5	3	7	4
C49	22	1	2	2	3	2	2	3	3	3	4	2	2	3	3	34	7	7	4	10	6
C50	23	0	3	3	2	1	2	1	2	2	3	3	1	3	4	30	8	4	4	7	7
C51	22	1	4	4	5	3	2	3	2	4	4	4	3	4	4	46	13	8	7	10	8
C52	22	1	3	3	3	2	3	3	2	3	3	3	2	3	4	37	9	8	5	8	7
C53	22	1	3	3	4	2	3	3	2	2	3	3	3	3	3	37	10	8	6	7	6
C54	23	1	4	3	4	3	4	4	4	5	5	4	4	5	5	54	11	11	8	14	10
C55	23	1	3	3	3	2	2	2	3	3	4	4	3	3	3	38	9	6	7	10	6
C56	22	1	3	3	3	1	2	1	3	3	3	4	3	4	4	37	9	4	7	9	8
C57	23	1	3	3	3	3	2	3	2	2	2	3	3	2	2	33	9	8	6	6	4
C58	23	0	2	3	3	1	1	1	3	3	3	3	1	3	3	30	8	3	4	9	6
C59	22	0	3	3	3	3	3	3	3	3	3	3	3	3	5	41	9	9	6	9	8
C60	23	1	3	3	3	2	3	3	4	4	4	3	3	4	4	43	9	8	6	12	8
C61	21	1	3	3	3	2	2	3	3	3	4	3	2	4	4	39	9	7	5	10	8
C62	22	1	4	4	4	3	3	4	3	3	3	4	3	4	4	46	12	10	7	9	8
C63	22	1	3	3	3	3	3	3	4	4	4	3	3	4	4	44	9	9	6	12	8
C64	21	0	4	4	4	2	2	3	4	4	4	4	3	5	5	48	12	7	7	12	10
C65	22	0	5	4	4	3	3	4	4	4	5	4	4	5	5	54	13	10	8	13	10
C66	21	0	3	3	3	3	3	2	3	3	3	3	3	3	3	38	9	8	6	9	6
C67	22	0	3	3	3	2	2	3	3	3	3	2	2	3	3	35	9	7	4	9	6
C68	22	1	2	3	3	2	2	2	2	2	2	2	2	3	3	30	8	6	4	6	6
C69	24	0	3	3	3	3	4	3	3	3	3	4	4	4	4	44	9	10	8	9	8
C70	22	0	5	5	5	4	4	4	5	5	5	4	3	5	5	59	15	12	7	15	10
C71	22	1	3	3	3	1	1	1	2	4	4	2	2	3	3	32	9	3	4	10	6
C72	21	0	3	3	4	2	3	2	2	2	3	3	3	2	2	34	10	7	6	7	4
C73	20	1	4	4	4	3	4	4	4	4	4	4	3	5	5	52	12	11	7	12	10
C74	21	0	2	2	1	1	2	1	3	3	3	2	1	3	3	27	5	4	3	9	6
C75	22	1	4	4	3	4	3	4	4	4	4	3	3	3	4	47	11	11	6	12	7
C76	21	0	4	4	3	3	3	4	4	4	4	3	3	5	5	49	11	10	6	12	10
C77	23	1	3	4	4	2	4	3	3	3	4	3	4	4	4	45	11	9	7	10	8
C78	21	0	3	3	3	2	2	3	2	2	3	2	2	3	3	33	9	7	4	7	6
C79	22	1	4	3	3	1	2	3	3	3	3	2	3	3	3	36	10	6	5	9	6
C80	24	0	3	3	3	2	3	3	4	4	4	3	3	4	5	44	9	8	6	12	9
C81	22	1	2	3	2	1	1	2	2	2	3	2	2	3	3	28	7	4	4	7	6
C82	22	1	4	3	3	3	4	3	4	4	4	4	3	4	4	47	10	10	7	12	8
C83	21	1	4	5	4	1	1	3	5	4	5	3	3	5	4	47	13	5	6	14	9
C84	23	0	3	4	2	2	3	3	4	3	3	3	3	4	4	41	9	8	6	10	8
C85	22	0	3	3	3	1	1	2	3	3	3	3	2	3	3	33	9	4	5	9	6
C86	22	0	3	3	3	2	2	3	2	2	3	3	3	3	3	35	9	7	6	7	6
C87	22	0	3	3	3	2	4	4	5	5	5	4	3	5	5	51	9	10	7	15	10
C88	22	1	3	4	3	4	3	4	4	4	4	5	4	4	4	50	10	11	9	12	8
C89	22	1	3	4	4	3	2	3	1	2	2	3	2	3	3	35	11	8	5	5	6
C90	22	1	3	3	4	1	2	2	3	3	4	2	2	3	3	35	10	5	4	10	6
C91	21	1	5	5	5	3	3	4	4	4	4	5	4	5	5	56	15	10	9	12	10
C92	22	1	5	5	4	4	4	5	4	4	4	4	5	5	5	58	14	13	9	12	10
C93	22	0	5	3	3	2	4	3	4	4	5	3	3	4	5	48	11	9	6	13	9
C94	24	1	2	2	3	4	2	4	3	3	3	5	5	4	4	44	7	10	10	9	8
C95	22	1	5	5	5	3	3	3	4	5	5	4	3	5	5	55	15	9	7	14	10
C96	19	0	3	3	3	2	3	3	3	3	4	3	4	3	3	40	9	8	7	10	6
C97	20	1	2	3	2	1	1	2	2	2	2	1	1	3	3	25	7	4	2	6	6
C98	24	1	3	3	2	1	1	1	2	2	3	2	2	2	2	26	8	3	4	7	4
C99	21	1	3	3	3	2	2	3	3	3	3	2	3	3	4	37	9	7	5	9	7
C100	23	0	4	4	5	4	3	4	2	2	3	4	4	3	4	46	13	11	8	7	7
C101	23	0	1	1	3	1	1	2	4	4	4	2	2	3	3	31	5	4	4	12	6
C102	24	0	3	3	4	2	2	3	3	3	3	2	3	4	4	39	10	7	5	9	8
C103	23	0	3	4	3	3	5	2	2	2	4	4	5	4	4	45	10	10	9	8	8
C104	24	1	3	3	4	2	3	3	3	3	3	3	2	3	3	38	10	8	5	9	6
C105	23	0	3	3	4	2	2	3	3	3	3	3	3	3	3	38	10	7	6	9	6
C106	22	1	3	2	3	1	2	2	4	4	3	3	3	4	3	37	8	5	6	11	7
C107	23	0	2	2	3	1	1	2	3	3	3	3	2	2	2	29	7	4	5	9	4
C108	22	1	3	3	3	1	1	4	4	4	3	4	2	4	4	40	9	6	6	11	8
C109	22	1	4	4	4	3	3	4	4	3	4	4	5	4	5	51	12	10	9	11	9
C110	22	1	3	3	3	3	3	4	3	3	3	3	3	4	4	42	9	10	6	9	8
C111	23	0	1	2	2	1	1	2	3	3	3	2	2	4	4	30	5	4	4	9	8
C112	24	1	3	3	4	3	1	2	2	2	2	4	3	2	2	33	10	6	7	6	4
C113	21	0	2	1	3	1	1	1	3	3	4	2	2	3	3	29	6	3	4	10	6
C114	23	1	4	4	3	2	3	3	5	5	5	3	3	5	5	50	11	8	6	15	10
C115	21	0	4	3	3	2	3	3	3	3	3	2	3	4	4	40	10	8	5	9	8
C116	20	0	3	2	3	1	2	2	3	3	3	3	2	4	3	34	8	5	5	9	7
C117	23	0	3	3	3	1	2	3	4	3	4	3	3	3	4	39	9	6	6	11	7
C118	24	1	4	4	3	4	3	4	2	2	3	3	3	4	5	44	11	11	6	7	9
C119	18	1	3	2	3	2	2	1	4	4	4	2	2	4	3	36	8	5	4	12	7
C120	18	1	4	3	3	1	2	2	2	2	4	2	1	4	4	34	10	5	3	8	8
C121	19	0	3	2	4	4	3	5	3	3	3	4	4	4	4	46	9	12	8	9	8
C122	22	1	4	4	3	2	3	3	4	2	2	3	2	2	3	37	11	8	5	8	5
C123	24	1	1	1	3	1	2	2	1	2	2	2	1	2	2	22	5	5	3	5	4
C124	23	0	3	3	2	1	3	2	3	2	2	2	3	2	2	30	8	6	5	7	4
C125	23	0	3	2	2	1	1	1	2	3	3	2	1	2	3	26	7	3	3	8	5
C126	22	0	3	3	4	2	3	3	4	3	3	4	2	3	4	41	10	8	6	10	7
C127	22	0	4	2	3	2	3	3	4	5	3	3	4	5	5	46	9	8	7	12	10
C128	24	0	4	5	4	5	3	3	2	3	5	4	3	5	5	51	13	11	7	10	10
C129	23	1	3	4	4	1	2	2	1	2	2	3	2	3	4	33	11	5	5	5	7
C130	23	0	2	2	3	2	3	3	4	3	5	3	2	4	3	39	7	8	5	12	7
C131	24	0	2	4	4	1	1	3	1	3	3	2	2	3	3	32	10	5	4	7	6
C132	23	1	3	3	3	2	2	3	3	3	3	2	2	2	3	34	9	7	4	9	5
C133	22	1	2	2	3	1	1	1	3	4	3	2	2	2	3	29	7	3	4	10	5
C134	19	0	4	4	5	2	4	1	5	4	5	2	1	3	3	43	13	7	3	14	6
C135	18	1	2	2	2	1	1	2	3	2	2	2	1	3	4	27	6	4	3	7	7
C136	18	1	3	3	4	2	3	2	4	3	3	3	3	4	4	41	10	7	6	10	8
C137	19	1	2	2	3	1	1	2	4	3	3	4	3	4	4	36	7	4	7	10	8
C138	22	1	1	2	2	1	1	1	3	2	2	2	3	2	2	24	5	3	5	7	4
C139	23	1	4	4	4	1	2	2	3	2	3	3	2	3	3	36	12	5	5	8	6
C140	24	0	3	3	3	2	3	2	4	3	3	2	3	4	4	39	9	7	5	10	8
C141	22	0	4	4	4	1	2	1	4	2	3	2	2	4	4	37	12	4	4	9	8
C142	22	0	2	2	3	1	2	2	5	4	4	2	1	2	3	33	7	5	3	13	5
C143	23	0	1	1	3	1	3	1	4	2	4	1	1	1	1	24	5	5	2	10	2
C144	19	1	5	5	5	1	1	3	5	4	5	2	2	4	3	45	15	5	4	14	7
C145	20	0	3	3	3	1	2	2	3	3	3	2	3	2	2	32	9	5	5	9	4
C146	23	0	4	3	3	1	1	4	3	3	3	1	1	3	3	33	10	6	2	9	6
C147	19	0	2	2	4	3	3	2	3	3	4	3	1	4	5	39	8	8	4	10	9
C148	23	0	2	3	3	1	4	2	4	2	2	4	2	2	2	33	8	7	6	8	4
C149	24	1	3	3	4	2	2	3	4	3	3	3	3	2	3	38	10	7	6	10	5
C150	19	0	2	2	1	1	2	1	4	4	3	2	1	3	2	28	5	4	3	11	5
C151	23	1	5	5	4	2	3	3	5	4	5	3	3	5	5	52	14	8	6	14	10
C152	21	0	3	3	3	2	2	1	3	3	4	3	2	3	3	35	9	5	5	10	6
C153	22	1	5	5	4	3	4	3	5	4	4	5	5	5	5	57	14	10	10	13	10
C154	21	1	3	5	4	2	4	3	3	5	5	3	1	4	5	47	12	9	4	13	9
C155	22	0	3	4	3	2	1	2	3	3	3	2	1	3	3	33	10	5	3	9	6
C156	24	0	1	1	2	1	1	2	1	1	2	2	2	2	1	19	4	4	4	4	3
C157	22	1	3	2	3	1	5	3	2	1	1	3	2	3	3	32	8	9	5	4	6
C158	21	1	3	3	2	2	3	3	3	3	2	3	3	4	3	37	8	8	6	8	7
C159	24	0	3	2	2	1	1	2	4	2	2	2	2	3	3	29	7	4	4	8	6
C160	23	0	5	5	5	2	2	4	5	4	5	3	2	5	4	51	15	8	5	14	9
C161	21	1	1	1	3	1	1	2	3	1	3	1	2	1	1	21	5	4	3	7	2
C162	23	1	4	3	4	4	2	3	3	2	2	5	4	4	4	44	11	9	9	7	8
C163	23	0	3	3	4	1	3	1	2	1	3	3	3	3	3	33	10	5	6	6	6
C164	22	0	5	4	5	1	1	3	3	3	3	2	2	3	3	38	14	5	4	9	6
C165	21	0	1	1	1	1	3	3	2	3	3	1	1	3	3	26	3	7	2	8	6
C166	23	0	3	3	4	2	3	3	2	3	3	2	1	2	2	33	10	8	3	8	4
C167	19	0	3	3	3	3	2	2	3	3	4	2	3	3	3	37	9	7	5	10	6
C168	23	0	4	3	3	1	2	2	3	3	3	2	3	3	3	35	10	5	5	9	6
C169	21	0	1	1	2	1	1	1	3	2	2	1	1	3	2	21	4	3	2	7	5
C170	23	1	3	3	2	1	3	2	3	3	3	2	1	3	3	32	8	6	3	9	6
C171	21	0	1	1	2	1	3	1	3	3	4	2	1	3	3	28	4	5	3	10	6
C172	23	0	1	1	3	1	1	2	1	1	1	2	1	4	4	23	5	4	3	3	8
C173	23	1	5	5	4	2	2	3	2	3	3	5	4	3	4	45	14	7	9	8	7
C174	24	0	3	3	3	3	4	3	3	3	3	3	2	3	3	39	9	10	5	9	6
C175	22	0	4	2	3	1	4	3	5	2	3	3	2	4	4	40	9	8	5	10	8
C176	23	0	1	2	4	1	1	2	1	1	1	1	2	4	2	23	7	4	3	3	6
C177	23	1	2	2	1	1	1	2	2	1	1	2	1	1	1	18	5	4	3	4	2
C178	21	1	3	3	2	3	2	2	4	3	3	3	4	4	3	39	8	7	7	10	7
C179	24	1	4	3	3	2	3	3	4	3	3	4	3	4	4	43	10	8	7	10	8
C180	22	0	5	5	3	1	2	2	4	4	4	3	2	4	4	43	13	5	5	12	8
C181	23	0	2	3	3	1	3	3	4	3	3	3	2	3	3	36	8	7	5	10	6
C182	22	1	1	2	3	3	3	3	4	2	2	3	3	2	3	34	6	9	6	8	5
C183	22	1	4	4	5	3	2	4	5	4	4	5	3	4	5	52	13	9	8	13	9
C184	22	1	3	3	3	3	3	2	3	3	3	3	3	3	3	38	9	8	6	9	6
C185	23	0	3	3	5	1	2	4	3	4	3	2	4	5	4	43	11	7	6	10	9
C186	22	0	3	2	1	1	2	1	3	1	2	2	2	2	2	24	6	4	4	6	4
C187	24	0	3	2	2	1	5	3	5	2	3	2	1	2	2	33	7	9	3	10	4
C188	23	0	3	3	1	2	1	1	4	2	2	1	2	4	5	31	7	4	3	8	9
C189	19	0	3	1	4	2	1	1	3	3	3	2	3	3	3	32	8	4	5	9	6
C190	23	1	4	4	5	5	3	4	2	1	1	5	5	3	3	45	13	12	10	4	6
C191	18	0	4	3	3	1	2	5	5	4	4	2	3	3	3	42	10	8	5	13	6
C192	24	0	1	1	2	1	1	1	1	1	1	1	1	3	2	17	4	3	2	3	5
C193	22	1	3	3	2	2	2	3	3	4	3	3	3	3	4	38	8	7	6	10	7
C194	23	1	5	5	5	5	2	4	4	4	5	5	4	5	5	58	15	11	9	13	10
C195	20	1	3	3	2	3	1	2	5	5	5	3	1	5	5	43	8	6	4	15	10
C196	22	1	4	4	4	3	3	4	4	4	3	3	5	5	5	51	12	10	8	11	10
C197	21	1	4	4	1	1	2	2	2	3	3	2	3	3	4	34	9	5	5	8	7
C198	22	0	3	3	2	2	3	2	3	3	3	3	3	3	2	35	8	7	6	9	5
C199	22	1	3	3	3	3	2	3	3	3	3	4	5	5	5	45	9	8	9	9	10
C200	21	1	3	4	4	2	5	4	2	3	4	5	4	5	5	50	11	11	9	9	10
C201	21	1	2	1	2	3	3	3	2	3	3	3	3	1	3	32	5	9	6	8	4
C202	20	1	3	3	4	4	3	3	4	4	4	3	3	4	5	47	10	10	6	12	9
C203	21	1	4	2	3	3	2	3	2	2	2	3	3	5	3	37	9	8	6	6	8
C204	22	1	3	2	3	3	3	3	3	1	3	1	1	3	3	32	8	9	2	7	6
C205	22	0	3	3	2	2	2	4	3	3	3	2	3	4	4	38	8	8	5	9	8
C206	20	1	5	5	4	4	2	2	3	3	3	3	4	5	5	48	14	8	7	9	10
C207	22	1	5	5	4	3	3	3	1	2	2	3	3	4	5	43	14	9	6	5	9
C208	22	1	2	2	1	1	3	2	3	2	3	3	2	4	2	30	5	6	5	8	6
C209	21	1	1	1	1	1	1	2	5	4	4	3	2	3	3	31	3	4	5	13	6
C210	22	1	3	4	2	1	2	4	2	2	3	4	3	5	5	40	9	7	7	7	10
C211	21	0	4	4	4	2	2	2	3	4	3	3	3	4	4	42	12	6	6	10	8
C212	21	0	5	3	3	3	3	3	4	4	4	3	3	3	3	44	11	9	6	12	6
C213	22	0	2	2	1	1	1	1	2	2	1	2	2	2	4	23	5	3	4	5	6
C214	21	0	4	4	4	1	1	1	2	3	4	1	3	3	3	34	12	3	4	9	6
C215	21	0	3	3	2	3	2	3	3	3	3	3	3	2	3	36	8	8	6	9	5
C216	21	0	3	3	3	3	2	1	3	3	3	3	3	2	2	34	9	6	6	9	4

## Sheet: StressROC
Id_No	Age	Gender	Tot_SCSS	DASQ1	DASQ2	DASQ3	DASQ4	DASQ5	DASQ6	DASQ7	DASQ8	DASQ9	DASQ10	DASQ11	DASQ12	DAS13	DASQ14	STRESSToT	Stressed	SI	SSP	CF	AD	CA
R1	20	1	52	3	3	3	3	2	2	2	3	3	3	3	2	3	3	38	Yes	12	11	7	12	10
R2	22	1	58	3	2	3	3	2	2	2	3	3	3	3	3	3	3	38	Yes	14	13	9	12	10
R3	22	1	52	3	3	3	3	2	0	2	3	2	3	3	2	3	2	34	Yes	13	9	8	13	9
R4	23	1	49	3	3	3	2	3	1	1	2	3	2	2	2	2	3	32	Yes	13	11	7	12	6
R5	23	0	36	3	3	2	2	1	3	0	3	2	3	2	3	3	2	32	Yes	15	3	6	6	6
R6	22	1	57	3	3	3	2	2	2	1	2	2	3	3	2	2	2	32	Yes	12	13	10	14	8
R7	21	0	48	3	2	3	3	2	3	1	2	2	3	2	2	2	2	32	Yes	12	7	7	12	10
R8	22	0	59	1	2	2	2	1	3	2	3	3	2	3	2	3	3	32	Yes	15	12	7	15	10
R9	22	0	51	3	2	2	3	3	3	1	2	2	3	2	2	2	2	32	Yes	9	10	7	15	10
R10	24	0	44	1	2	3	3	2	3	1	2	2	3	2	2	3	2	31	Yes	9	8	6	12	9
R11	19	0	46	3	2	3	2	1	3	1	3	2	3	2	1	3	2	31	Yes	9	12	8	9	8
R12	22	0	34	3	3	2	1	2	3	1	3	1	2	3	1	2	3	30	Yes	9	5	6	6	8
R13	21	0	49	3	2	3	3	2	1	1	3	2	2	2	2	2	2	30	Yes	11	10	6	12	10
R14	22	0	48	1	3	2	1	2	3	1	2	3	2	2	2	3	3	30	Yes	11	9	6	13	9
R15	22	1	57	3	1	3	3	2	2	2	2	1	3	3	2	2	1	30	Yes	14	10	10	13	10
R16	24	0	33	3	3	2	2	1	3	1	3	1	2	3	1	2	3	30	Yes	7	9	3	10	4
R17	24	1	44	3	3	3	3	2	1	1	2	1	2	3	2	2	1	29	Yes	14	7	8	6	9
R18	22	0	51	3	3	2	2	2	3	1	2	1	2	2	2	2	1	28	Yes	13	9	7	12	10
R19	24	0	27	3	3	3	1	1	2	0	2	2	3	3	1	2	2	28	Yes	8	5	3	7	4
R20	21	1	56	3	2	3	3	1	1	1	2	2	3	2	1	2	2	28	Yes	15	10	9	12	10
R21	24	1	38	2	1	2	2	2	3	2	2	2	2	2	2	2	2	28	Yes	10	8	5	9	6
R22	19	0	44	3	2	2	2	1	3	1	2	2	2	1	1	2	3	27	Yes	8	7	7	14	8
R23	22	1	51	2	2	3	2	3	2	1	2	1	2	2	2	2	1	27	Yes	9	11	10	11	10
R24	23	1	54	3	2	2	3	2	1	1	2	1	2	2	3	2	1	27	Yes	11	11	8	14	10
R25	22	1	47	2	2	2	2	3	1	1	2	2	2	2	2	2	2	27	Yes	10	10	7	12	8
R26	22	1	55	3	2	3	3	1	1	1	2	1	2	2	1	3	2	27	Yes	15	9	7	14	10
R27	22	1	51	3	2	1	3	2	1	2	2	2	3	1	2	2	1	27	Yes	12	10	9	11	9
R28	18	0	45	2	3	2	1	1	2	1	2	2	2	3	1	2	2	26	Yes	11	6	5	15	8
R29	23	0	50	2	1	3	2	3	1	1	2	1	2	1	2	2	2	25	Yes	15	11	8	10	6
R30	21	1	49	2	0	3	2	2	1	1	3	2	2	2	1	2	2	25	Yes	9	13	10	9	8
R31	22	1	44	2	2	3	2	3	1	1	2	1	2	1	3	1	1	25	Yes	6	10	10	9	9
R32	22	1	46	2	1	2	2	1	2	1	2	2	2	2	2	2	2	25	Yes	12	10	7	9	8
R33	22	0	54	2	1	2	2	1	2	1	2	2	2	2	2	2	2	25	Yes	13	10	8	13	10
R34	24	0	44	2	2	2	2	1	2	0	2	2	2	2	2	2	2	25	Yes	9	10	8	9	8
R35	23	0	42	2	2	2	1	1	3	1	2	1	2	2	1	2	2	24	Yes	10	7	5	12	8
R36	23	0	38	3	2	2	1	1	3	1	2	1	2	2	1	1	2	24	Yes	9	5	6	10	8
R37	21	1	47	3	1	2	3	1	1	2	2	1	3	1	1	2	1	24	Yes	13	5	6	14	9
R38	23	1	52	0	2	3	2	1	3	0	2	1	3	3	1	2	1	24	Yes	14	8	6	14	10
R39	23	1	45	2	1	3	3	2	0	0	2	1	3	3	2	1	1	24	Yes	13	12	10	4	6
R40	22	0	42	1	2	1	1	1	2	1	2	2	2	3	1	2	2	23	Yes	12	7	4	11	8
R41	21	1	39	2	1	2	2	1	3	2	1	1	2	2	1	2	1	23	Yes	8	7	7	10	7
R42	23	0	43	2	1	1	2	3	3	1	2	0	2	2	1	2	1	23	Yes	11	7	6	10	9
R43	22	0	41	0	2	1	1	2	3	2	3	1	2	3	0	1	1	22	Yes	10	8	6	10	7
R44	19	0	39	2	3	1	1	0	3	1	1	0	2	3	2	2	1	22	Yes	8	8	4	10	9
R45	21	1	37	2	1	1	2	1	1	1	2	1	2	2	2	2	2	22	Yes	8	8	6	8	7
R46	22	0	33	1	2	2	1	1	3	0	2	1	2	2	1	2	1	21	Yes	7	3	5	10	8
R47	21	0	28	1	3	1	1	0	3	1	3	2	1	2	1	1	1	21	Yes	7	4	3	8	6
R48	22	1	37	2	1	1	2	1	1	1	2	2	1	2	1	2	2	21	Yes	9	4	7	9	8
R49	22	0	41	2	1	2	2	1	2	1	2	1	2	1	2	1	1	21	Yes	9	9	6	9	8
R50	22	1	47	2	1	2	2	1	1	1	2	1	2	2	2	1	1	21	Yes	11	11	6	12	7
R51	23	1	45	2	2	2	2	1	2	1	1	1	2	1	2	1	1	21	Yes	11	9	7	10	8
R52	24	1	44	3	1	1	3	0	1	1	1	1	3	2	1	2	1	21	Yes	11	11	6	7	9
R53	23	0	26	2	3	1	2	0	2	1	3	0	2	3	0	2	0	21	Yes	7	3	3	8	5
R54	22	0	33	0	3	3	0	0	2	2	3	0	2	3	0	1	2	21	Yes	7	5	3	13	5
R55	20	0	32	1	0	1	1	0	3	2	1	3	1	3	1	1	3	21	Yes	9	5	5	9	4
R56	21	1	47	2	1	1	3	0	1	2	2	2	1	0	3	2	1	21	Yes	12	9	4	13	9
R57	19	0	37	1	0	2	3	2	1	2	1	0	2	3	1	2	1	21	Yes	9	7	5	10	6
R58	23	0	23	0	3	0	1	0	3	2	2	1	2	2	1	2	2	21	Yes	7	4	3	3	6
R59	24	1	43	2	1	1	1	2	0	3	2	1	2	2	1	2	1	21	Yes	10	8	7	10	8
R60	22	1	36	2	1	1	2	1	1	1	2	1	1	2	1	2	2	20	Yes	10	6	5	9	6
R61	23	0	45	1	1	2	2	0	1	1	2	2	2	1	1	2	2	20	Yes	10	10	9	8	8
R62	22	1	42	2	1	2	2	1	1	1	2	1	2	1	1	2	1	20	Yes	9	10	6	9	8
R63	23	1	34	0	3	3	1	0	3	2	2	1	1	2	0	1	1	20	Yes	9	7	4	9	5
R64	22	0	40	0	2	2	1	0	3	2	1	0	2	2	1	3	1	20	Yes	9	8	5	10	8
R65	22	0	43	0	0	2	2	3	2	1	2	0	2	2	1	2	1	20	Yes	13	5	5	12	8
R66	22	1	34	2	1	0	2	1	2	0	2	1	3	2	1	2	1	20	Yes	6	9	6	8	5
R67	19	0	40	2	1	2	2	1	2	1	1	1	2	1	1	1	1	19	Yes	9	8	7	10	6
R68	22	1	41	1	2	2	1	2	0	0	1	1	1	2	3	1	1	18	No	10	7	9	11	4
R69	23	1	45	2	3	2	1	0	1	0	2	1	2	2	0	1	1	18	No	14	4	6	13	8
R70	22	1	43	3	2	1	1	2	0	0	1	0	2	2	1	2	1	18	No	8	7	6	12	10
R71	22	0	44	2	2	1	1	1	2	0	1	1	2	2	1	1	1	18	No	11	7	7	11	8
R72	23	0	34	2	1	2	1	2	2	0	1	0	1	2	2	1	1	18	No	6	4	7	9	8
R73	22	1	35	1	0	1	2	2	1	2	2	1	1	2	1	1	1	18	No	9	8	6	6	6
R74	23	1	43	2	2	1	1	2	1	1	1	1	2	1	1	1	1	18	No	9	8	6	12	8
R75	23	0	39	1	1	1	2	1	2	1	1	1	2	2	1	1	1	18	No	9	6	6	11	7
R76	23	0	39	1	3	1	2	1	0	0	2	1	2	2	1	1	1	18	No	7	8	5	12	7
R77	19	0	32	0	2	0	0	0	3	3	3	0	2	2	0	2	1	18	No	8	4	5	9	6
R78	23	1	44	2	1	1	2	1	0	0	1	1	2	2	2	1	1	17	No	12	7	8	9	8
R79	23	0	30	2	1	2	0	0	2	1	2	1	2	2	0	1	1	17	No	8	4	4	7	7
R80	23	0	29	1	2	2	0	0	3	0	2	0	1	2	1	1	2	17	No	7	4	5	9	4
R81	24	0	32	1	3	2	1	0	3	1	2	0	1	2	0	1	0	17	No	10	5	4	7	6
R82	24	0	39	2	1	1	1	2	3	0	1	0	1	2	1	1	1	17	No	9	7	5	10	8
R83	18	0	42	2	2	0	2	1	0	1	0	0	0	2	3	2	2	17	No	10	8	5	13	6
R84	23	0	49	2	1	2	2	0	1	0	2	1	2	1	0	1	1	16	No	11	13	8	9	8
R85	22	1	46	1	1	2	1	2	0	0	1	2	1	1	1	1	2	16	No	13	8	7	10	8
R86	23	0	30	2	0	2	2	1	1	0	1	1	2	2	1	0	1	16	No	8	3	4	9	6
R87	21	0	34	1	1	2	1	2	2	0	1	1	1	1	1	1	1	16	No	10	7	6	7	4
R88	21	0	33	1	1	1	1	2	2	0	1	1	1	2	1	1	1	16	No	9	7	4	7	6
R89	22	0	35	2	0	1	2	1	2	0	1	1	2	1	1	1	1	16	No	9	7	6	7	6
R90	22	1	35	2	0	2	2	0	0	1	2	1	2	0	1	2	1	16	No	11	8	5	5	6
R91	21	1	37	0	2	1	0	2	3	1	1	2	1	0	1	1	1	16	No	9	7	5	9	7
R92	23	0	46	1	2	2	1	1	3	0	1	0	1	2	1	1	0	16	No	13	11	8	7	7
R93	22	1	40	2	1	2	2	0	1	0	1	1	1	2	2	1	0	16	No	9	6	6	11	8
R94	22	1	38	0	0	2	0	2	1	0	2	1	2	2	1	2	1	16	No	9	8	6	9	6
R95	23	1	39	1	1	2	1	0	2	0	1	1	1	2	1	1	1	15	No	6	8	6	11	8
R96	24	0	39	1	1	2	1	2	2	1	1	0	1	1	1	1	0	15	No	10	7	5	9	8
R97	19	1	36	2	0	1	2	1	2	0	1	0	2	2	1	1	0	15	No	7	4	7	10	8
R98	23	0	33	0	2	0	1	0	3	2	0	0	1	3	0	1	2	15	No	10	6	2	9	6
R99	22	0	33	1	3	1	0	0	2	2	2	0	1	1	0	1	1	15	No	10	5	3	9	6
R100	22	1	32	1	0	2	1	2	0	0	1	0	2	2	1	1	2	15	No	8	9	5	4	6
R101	24	0	39	1	1	1	1	2	1	1	1	1	1	1	1	1	1	15	No	9	10	5	9	6
R102	20	0	32	0	1	1	0	0	2	0	1	2	2	1	1	2	1	14	No	8	3	4	9	8
R103	24	0	44	1	2	1	1	0	1	0	1	1	1	2	0	2	1	14	No	11	8	7	10	8
R104	23	0	35	1	1	1	1	0	2	0	1	2	1	2	0	1	1	14	No	7	5	6	9	8
R105	22	0	34	1	2	1	1	1	2	1	1	0	0	1	1	1	1	14	No	9	7	5	3	10
R106	22	1	38	2	2	1	1	1	0	0	1	1	1	1	1	1	1	14	No	11	4	7	10	6
R107	22	1	44	1	1	1	1	1	2	0	1	1	1	1	1	1	1	14	No	9	9	6	12	8
R108	21	0	38	1	1	1	1	1	2	0	1	1	1	1	1	1	1	14	No	9	8	6	9	6
R109	22	0	35	1	1	1	1	1	2	0	1	1	1	1	1	1	1	14	No	9	7	4	9	6
R110	22	1	32	1	1	1	1	0	2	2	1	1	1	1	0	1	1	14	No	9	3	4	10	6
R111	18	1	34	1	1	2	2	1	2	0	2	0	1	1	0	1	0	14	No	10	5	3	8	8
R112	22	0	37	0	1	0	1	0	2	2	1	0	2	2	0	2	1	14	No	12	4	4	9	8
R113	23	0	33	0	2	0	0	0	2	0	2	1	0	3	2	1	1	14	No	8	7	6	8	4
R114	23	0	33	0	3	2	0	0	3	1	1	0	0	1	0	2	1	14	No	10	8	3	8	4
R115	19	0	42	2	1	1	0	1	1	0	1	2	1	1	0	1	1	13	No	9	6	5	12	10
R116	22	1	30	1	2	2	1	0	1	0	1	0	1	2	0	1	1	13	No	7	5	6	6	6
R117	22	1	42	2	1	1	1	1	0	0	1	0	1	2	1	1	1	13	No	9	8	8	9	8
R118	23	1	38	1	2	1	1	1	0	0	1	1	1	1	1	1	1	13	No	9	6	7	10	6
R119	23	0	41	1	0	1	1	0	2	0	1	1	1	2	1	1	1	13	No	9	8	6	10	8
R120	22	0	46	2	0	0	1	2	1	0	1	0	1	2	2	1	0	13	No	9	8	7	12	10
R121	24	0	51	1	0	0	2	0	3	0	2	0	2	1	1	1	0	13	No	13	11	7	10	10
R122	21	0	35	0	1	0	2	0	3	0	1	2	1	0	0	1	2	13	No	9	5	5	10	6
R123	23	1	44	1	0	0	0	1	0	0	1	3	1	2	1	1	2	13	No	11	9	9	7	8
R124	21	0	28	1	0	2	0	2	0	0	1	2	0	3	0	1	1	13	No	4	5	3	10	6
R125	22	0	24	0	2	0	0	1	2	0	0	1	1	1	2	2	1	13	No	6	4	4	6	4
R126	18	1	38	1	2	0	1	0	2	0	1	1	1	2	0	1	0	12	No	7	6	5	12	8
R127	22	1	42	2	1	1	1	0	1	1	1	0	1	0	1	1	1	12	No	14	3	7	10	8
R128	24	1	50	2	0	1	0	0	2	0	1	0	2	2	1	1	0	12	No	14	7	7	12	10
R129	22	1	37	2	1	1	2	1	1	0	1	0	1	1	0	1	0	12	No	9	8	5	8	7
R130	23	1	50	2	0	1	2	0	1	1	2	0	1	1	0	0	1	12	No	11	8	6	15	10
R131	20	0	34	1	2	0	1	1	2	0	1	0	1	1	0	1	1	12	No	8	5	5	9	7
R132	24	0	29	0	0	2	0	0	3	0	1	0	2	0	2	1	1	12	No	7	4	4	8	6
R133	21	0	26	0	1	3	0	0	2	2	1	0	0	1	0	0	2	12	No	3	7	2	8	6
R134	23	0	36	0	0	2	1	0	3	2	1	0	0	1	1	1	0	12	No	8	7	5	10	6
R135	24	0	17	0	0	0	0	0	3	3	0	3	0	0	0	0	3	12	No	4	3	2	3	5
R136	22	1	39	1	1	1	1	1	0	1	1	1	0	0	1	1	1	11	No	9	7	6	9	8
R137	22	0	43	2	1	0	0	0	2	0	1	0	1	2	0	1	1	11	No	11	5	7	12	8
R138	23	0	34	1	2	0	1	0	2	1	1	0	1	1	0	1	0	11	No	8	4	6	6	10
R139	22	1	37	1	1	1	0	1	0	0	1	1	1	1	1	1	1	11	No	10	8	6	7	6
R140	24	1	44	1	1	2	1	2	0	0	1	0	1	1	1	0	0	11	No	7	10	10	9	8
R141	22	1	37	1	0	2	1	0	0	2	0	1	1	1	0	1	1	11	No	11	8	5	8	5
R142	21	0	21	1	1	1	1	0	1	0	1	1	1	1	0	1	1	11	No	4	3	2	7	5
R143	20	1	36	1	1	1	1	0	0	0	1	0	1	2	1	1	0	10	No	7	7	4	12	6
R144	24	1	33	1	0	1	1	0	2	0	1	0	1	1	1	1	0	10	No	7	7	7	6	6
R145	22	1	34	0	1	1	0	0	1	0	1	1	1	2	0	1	1	10	No	7	7	4	10	6
R146	23	0	31	0	2	0	1	0	2	0	1	0	1	1	0	1	1	10	No	5	4	4	12	6
R147	23	0	30	0	2	0	1	0	2	0	1	0	1	2	0	1	0	10	No	8	6	5	7	4
R148	23	0	51	2	1	1	1	0	0	0	1	0	1	2	0	1	0	10	No	15	8	5	14	9
R149	22	1	31	1	1	0	0	0	0	1	0	1	1	2	1	1	0	9	No	7	4	6	9	5
R150	21	1	28	0	1	1	0	1	1	0	1	0	1	2	0	1	0	9	No	5	5	5	9	4
R151	21	1	39	1	0	1	1	0	2	0	1	0	1	1	0	1	0	9	No	9	7	5	10	8
R152	22	1	50	0	0	2	0	1	1	0	1	0	1	1	1	1	0	9	No	10	11	9	12	8
R153	23	0	38	1	0	0	1	1	1	0	1	0	1	1	1	1	0	9	No	10	7	6	9	6
R154	22	1	29	1	0	0	1	1	3	0	1	0	1	0	0	1	0	9	No	7	3	4	10	5
R155	19	0	43	0	2	1	0	0	2	1	0	0	1	1	0	1	0	9	No	13	7	3	14	6
R156	18	1	41	1	0	1	1	0	0	1	1	0	1	1	1	1	0	9	No	10	7	6	10	8
R157	23	1	31	0	1	1	0	0	1	0	2	0	1	1	0	1	0	8	No	5	4	5	10	7
R158	21	0	29	0	1	0	0	0	2	0	2	0	1	2	0	0	0	8	No	6	3	4	10	6
R159	23	1	33	1	0	1	1	2	0	0	0	0	2	1	0	0	0	8	No	11	5	5	5	7
R160	23	1	45	0	0	1	2	1	0	1	0	0	1	0	0	2	0	8	No	14	7	9	8	7
R161	23	0	31	0	1	0	1	0	0	0	0	0	1	1	2	2	0	8	No	7	4	3	8	9
R162	21	1	32	0	1	1	0	0	2	0	0	1	0	2	0	0	0	7	No	7	4	4	9	8
R163	22	1	28	1	0	0	1	0	0	0	1	1	1	0	0	1	1	7	No	7	4	4	7	6
R164	22	1	35	1	0	0	1	1	1	0	1	0	1	0	1	0	0	7	No	10	5	4	10	6
R165	21	0	40	2	1	0	0	0	1	0	1	0	1	0	0	1	0	7	No	10	8	5	9	8
R166	23	1	36	1	0	0	1	0	1	0	1	0	1	1	0	1	0	7	No	12	5	5	8	6
R167	23	0	24	0	1	0	0	0	2	0	1	0	0	2	0	1	0	7	No	5	5	2	10	2
R168	19	0	28	0	0	1	1	0	2	0	0	1	1	0	0	1	0	7	No	5	4	3	11	5
R169	23	0	35	0	1	1	0	0	1	0	1	0	0	2	0	1	0	7	No	10	5	5	9	6
R170	23	0	23	0	0	0	0	0	2	1	2	0	0	1	0	1	0	7	No	5	4	3	3	8
R171	23	0	30	0	1	1	1	0	0	0	0	0	0	1	0	1	1	6	No	8	4	5	9	4
R172	24	1	33	1	0	0	1	0	1	0	0	0	1	1	0	1	0	6	No	10	6	7	6	4
R173	19	1	45	0	0	0	0	0	0	0	0	2	0	2	0	0	2	6	No	15	5	4	14	7
R174	24	1	38	1	0	0	0	1	1	1	1	0	1	0	0	0	0	6	No	10	7	6	10	5
R175	24	0	19	0	1	0	0	0	2	1	0	0	0	1	1	0	0	6	No	4	4	4	4	3
R176	23	1	33	1	0	0	1	0	1	0	1	0	1	0	0	0	0	5	No	9	8	6	6	4
R177	21	0	27	0	1	1	0	0	2	0	0	0	0	1	0	0	0	5	No	5	4	3	9	6
R178	24	1	26	1	1	1	1	0	0	0	1	0	0	0	0	0	0	5	No	8	3	4	7	4
R179	22	1	37	0	1	0	0	0	1	0	0	1	1	1	0	0	0	5	No	8	5	6	11	7
R180	18	1	36	0	1	0	0	0	1	0	0	0	1	1	0	1	0	5	No	8	5	4	12	7
R181	23	0	33	0	0	0	0	0	2	0	0	1	0	1	0	0	1	5	No	10	5	6	6	6
R182	23	1	18	0	0	1	0	0	2	1	0	0	0	1	0	0	0	5	No	5	4	3	4	2
R183	22	1	30	0	0	1	1	0	2	0	0	0	0	0	0	0	0	4	No	8	6	4	6	6
R184	22	0	33	1	1	0	1	0	0	0	0	0	1	0	0	0	0	4	No	9	4	5	9	6
R185	24	1	22	0	0	0	1	0	1	0	0	0	0	2	0	0	0	4	No	5	5	3	5	4
R186	18	1	27	0	0	1	0	0	1	0	0	1	0	0	0	0	1	4	No	6	4	3	7	7
R187	22	1	24	0	0	1	0	0	2	0	0	0	1	0	0	0	0	4	No	5	3	5	7	4
R188	23	1	32	0	0	1	0	0	0	0	0	0	1	1	1	0	0	4	No	8	6	3	9	6
R189	23	0	30	0	0	0	0	1	2	0	0	0	0	0	0	0	0	3	No	5	4	4	9	8
R190	21	1	21	0	0	1	1	0	0	0	0	0	1	0	0	0	0	3	No	5	4	3	7	2
R191	22	0	38	0	0	0	1	0	0	0	1	0	0	1	0	0	0	3	No	14	5	4	9	6
R192	20	1	25	0	1	0	0	0	0	0	1	0	0	0	0	0	0	2	No	7	4	2	6	6
