# Supplementary material for: The Development and Validation of a Measure to Assess COVID-19 Stress among College Students for Sustainable Education
Source: MDPI journal article supplement (doi:10.3390/su13179828), 2021-09-01
Supplement: s1 [file s1 › Supplementary_Files/Suppl Material_Initial 40 Items.pdf]

### Student COVID 19 Stress Scale (Initial Items)

The questions ask you about your thoughts and feelings during the last month, particularly concerning the prevailing COVID-19 situation. In each case, you have to respond to how often you felt in a certain way. Please answer all of the questions. There are no right or wrong answers.

- 1- Never
- 2- Almost Never
- 3- Sometimes
- 4- Fairly Often
- 5- Very Often

| Item No. | Items                                                                                                                                                     |
|----------|-----------------------------------------------------------------------------------------------------------------------------------------------------------|
| 1.       | How often have you been upset due to fear of losing loved ones?#                                                                                          |
| 2.       | How often have you been upset while thinking that something awful might happen?#                                                                          |
| 3.       | How often have you got scared by thinking that you cannot get in touch with your friends and lose them?                                                   |
| 4.       | How often are you worried that once the pandemic(covid-19) is over, the relationships with the people outside the family will not be the same as earlier? |
| 5.       | How often have you feared and worried about your health?                                                                                                  |
| 6.       | In recent times, how often have you been upset for having conflicts with your family members?                                                             |
| 7.       | In recent times, how often have you felt scared from the thoughts of the death of near-ones?                                                              |
| 8.       | How often have you become fearful of interaction with strangers in your life?                                                                             |
| 9. *     | How often have you felt frustrated for not being able to meet friends?                                                                                    |
| 10. *    | How often have you felt irritated for not being able to go out with your friends or family?                                                               |
| 11.      | How often have you felt agitated due to over-exposure to parents?                                                                                         |
| 12.      | In recent times, how often have you felt worried and stressed, thinking what might happen to my parents if I become infected?                             |
| 13.      | How often have you felt irritated because things were not under your control?                                                                             |
| 14. *    | How often have you got nervous about getting infected while thinking of going out?                                                                        |
| 15. *    | How often have you got worried after getting news and updates regarding the pandemic (Covid-19)                                                           |
| 16.      | How often have you felt stressed out for not completing studying due to overuse of social media (Facebook, Instagram, etc.)?                              |
| 17. *    | How often have you been upset while thinking about your future life?                                                                                      |
| 18.      | How often have you got bored of not having any work to do?                                                                                                |
| 19.      | How often have you been frustrated while adapting to distance learning technologies and internet connectivity issues?                                     |
| 20. *    | How often have you felt nervous about not being able to meet the deadline for online submissions?                                                         |
| 21. *    | How often have you felt stressed out with online task submissions?                                                                                        |
| 22.      | How often have you been strained out due to a change in study pattern?                                                                                    |
| 23.      | How often have you been worried about thinking that you were not doing anything productive?                                                               |
| 24.      | How often have you felt nervous about not performing important tasks properly due to the pandemic (Covid-19)?                                             |
| 25. *    | How often have you felt stressed due to the excess load of task completion?                                                                               |
| 26.      | How often have you been worried about online submissions and not having proper network access?#                                                           |
| 27.      | How often have you been worried about not balancing the demands of the family with studying?                                                              |
| 28. *    | How often have you been worried about the impact of the pandemic on your career prospects?                                                                |
| 29.      | Due to the pandemic (Covid-19), how often have you felt anxious and “stressed”?                                                                           |
| 30.      | How often have you been tensed and felt nervous due to preoccupied thoughts of the pandemic (Covid-19)?                                                   |
| 31. *    | How often have you become irritated because of social distancing maintained due to Covid-19?                                                              |
| 32.      | In recent times, how often have you noticed excessively worry about contamination, preoccupation with symptoms about sickness, and washing your hands?    |

|                                                                                        |                                                                                                                                                  |
|----------------------------------------------------------------------------------------|--------------------------------------------------------------------------------------------------------------------------------------------------|
| 33.                                                                                    | Once your day starts, how often do you check your social media platforms (WhatsApp, Facebook, etc.) to get an update on the pandemic (Covid-19)? |
| 34.                                                                                    | In recent times, how often have you felt restless and were unable to sit still?                                                                  |
| 35.                                                                                    | How often do you check your body temperature or constantly notice body signs for illness or diseases?                                            |
| 36.                                                                                    | How often have you felt that the pandemic (Covid-19) is disrupting your ability to function normally?                                            |
| 37. *                                                                                  | How often you got disturbing nightmares or dreams?                                                                                               |
| 38. *                                                                                  | How often have you complained about having headaches, body pain, and feeling of faintness or dizziness?                                          |
| 39. *                                                                                  | How often have you felt sleep disturbances?                                                                                                      |
| 40.                                                                                    | How often you felt nervous about not being able to do proper physical exercises?                                                                 |
| Note: # = items removed due to the presence of similar items. * = items in final scale |                                                                                                                                                  |
